# Supplementary material
Source: HighWire-hosted journal article supplement (https://bmjopengastro.bmj.com/content/7/1/e000456)
Supplement: inline-supplementary-material-1 [file inline-supplementary-material-1.pdf]

## SUPPLEMENTARY MATERIALS

**Supplementary Table S1:** Code lists for study cohort identification

| CODE                                          | DESCRIPTION                              |
|-----------------------------------------------|------------------------------------------|
| <b>Colectomy (OPCS-4)</b>                     |                                          |
| H04.x                                         | Total excision of colon and rectum       |
| H05.x                                         | Total excision of colon                  |
| H06.x                                         | Extended excision of right hemicolon     |
| H07.x                                         | Other excision of right hemicolon        |
| H08.x                                         | Excision of transverse colon             |
| H09.x                                         | Excision of left hemicolon               |
| H10.x                                         | Excision of sigmoid colon                |
| H11.x                                         | Other excision of colon                  |
| H29.x                                         | Subtotal excision of colon               |
| H33.x                                         | Excision of rectum                       |
| <b>Ulcerative colitis (Read &amp; ICD-10)</b> |                                          |
| 14C4.11                                       | H/O: ulcerative colitis                  |
| J41..12                                       | Ulcerative colitis and/or proctitis      |
| J41..12                                       | Ulcerative colitis and/or proctitis      |
| J410.00                                       | Ulcerative proctocolitis                 |
| J410.00                                       | Ulcerative proctocolitis                 |
| J410000                                       | Ulcerative ileocolitis                   |
| J410100                                       | Ulcerative colitis                       |
| J410200                                       | Ulcerative rectosigmoiditis              |
| J410300                                       | Ulcerative proctitis                     |
| J410400                                       | Exacerbation of ulcerative colitis       |
| J410z00                                       | Ulcerative proctocolitis NOS             |
| J411.00                                       | Ulcerative (chronic) enterocolitis       |
| J412.00                                       | Ulcerative (chronic) ileocolitis         |
| J413.00                                       | Ulcerative pancolitis                    |
| Jyu4100                                       | [X]Other ulcerative colitis              |
| N031000                                       | Arthropathy in ulcerative colitis        |
| N045400                                       | Juvenile arthritis in ulcerative colitis |
| K51.x                                         | Ulcerative colitis                       |
| <b>Crohn's disease (Read &amp; ICD-10)</b>    |                                          |
| J08z900                                       | Orofacial Crohn's disease                |
| J40..00                                       | Regional enteritis - Crohn's disease     |
| J40..11                                       | Crohn's disease                          |
| J40..12                                       | Granulomatous enteritis                  |
| J400.00                                       | Regional enteritis of the small bowel    |
| J400000                                       | Regional enteritis of the duodenum       |
| J400100                                       | Regional enteritis of the jejunum        |
| J400200                                       | Crohn's disease of the terminal ileum    |
| J400300                                       | Crohn's disease of the ileum unspecified |

|                                                                         |                                                    |
|-------------------------------------------------------------------------|----------------------------------------------------|
| J400400                                                                 | Crohn's disease of the ileum NOS                   |
| J400500                                                                 | Exacerbation of Crohn's disease of small intestine |
| J400z00                                                                 | Crohn's disease of the small bowel NOS             |
| J401.00                                                                 | Regional enteritis of the large bowel              |
| J401000                                                                 | Regional enteritis of the colon                    |
| J401100                                                                 | Regional enteritis of the rectum                   |
| J401200                                                                 | Exacerbation of Crohn's disease of large intestine |
| J401z00                                                                 | Crohn's disease of the large bowel NOS             |
| J401z11                                                                 | Crohn's colitis                                    |
| J402.00                                                                 | Regional ileocolitis                               |
| J40z.00                                                                 | Regional enteritis NOS                             |
| J40z.11                                                                 | Crohn's disease NOS                                |
| Jyu4000                                                                 | [X]Other Crohn's disease                           |
| N045300                                                                 | Juvenile arthritis in Crohn's disease              |
| ZR3S.00                                                                 | Crohn's disease activity index                     |
| ZR3S.11                                                                 | CDAI—Crohn's disease activity index                |
| K50.x                                                                   | Crohn disease [regional enteritis]                 |
| <b>Cancer (Read &amp; ICD-10)</b>                                       |                                                    |
| CXX.x (excluding C44.x)                                                 | Malignant neoplasms                                |
| See Khan NF et al. BMC Fam Pract (2010) <sup>1</sup> for Read code list |                                                    |

<sup>1</sup> Khan, N. F., Perera, R., Harper, S. & Rose, P. W. Adaptation and validation of the Charlson Index for Read/OXMIS coded databases. BMC Fam. Pract. 11, 1 (2010).

**Supplementary Table S2:** Post-operative complications

|                                                                                                                                                                                                                                                                     |
|---------------------------------------------------------------------------------------------------------------------------------------------------------------------------------------------------------------------------------------------------------------------|
| <b>Gastrointestinal complications</b> , including <ul style="list-style-type: none"><li>• Small bowel obstruction</li><li>• Anastomotic stricture</li><li>• Pouchitis</li><li>• Gastrointestinal bleeding</li><li>• Colostomy complication or malfunction</li></ul> |
| <b>Wound problems</b> , including <ul style="list-style-type: none"><li>• Fistula</li><li>• Haematoma/seroma</li><li>• Wound dehiscence</li></ul>                                                                                                                   |
| <b>Infections</b> , including <ul style="list-style-type: none"><li>• Sepsis and bacteraemia</li><li>• Abscess</li><li>• Wound infection</li><li>• Urinary tract infection</li></ul>                                                                                |
| <b>Renal and endocrine complications</b> , including <ul style="list-style-type: none"><li>• Acute renal failure</li><li>• Fluid and electrolyte disorders (including hypokalaemia)</li><li>• Severe endocrine disorders</li></ul>                                  |
| <b>Cardiovascular disorders</b> , including <ul style="list-style-type: none"><li>• Thrombosis/embolism</li><li>• Myocardial infarction</li><li>• Cardiac arrest</li></ul>                                                                                          |
| <b>Pulmonary complications</b> , including <ul style="list-style-type: none"><li>• Acute respiratory failure</li></ul>                                                                                                                                              |

- Hypoxia
- Pleural effusion
- Pulmonary oedema

**Neurological disorders**, including

- Cerebrovascular disease

**Supplementary Figure 1.** Study design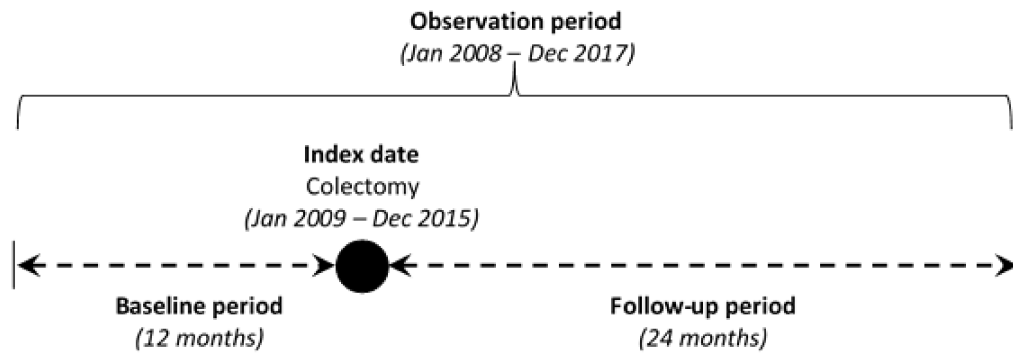

Supplementary Figure 2. Consort flow-diagram

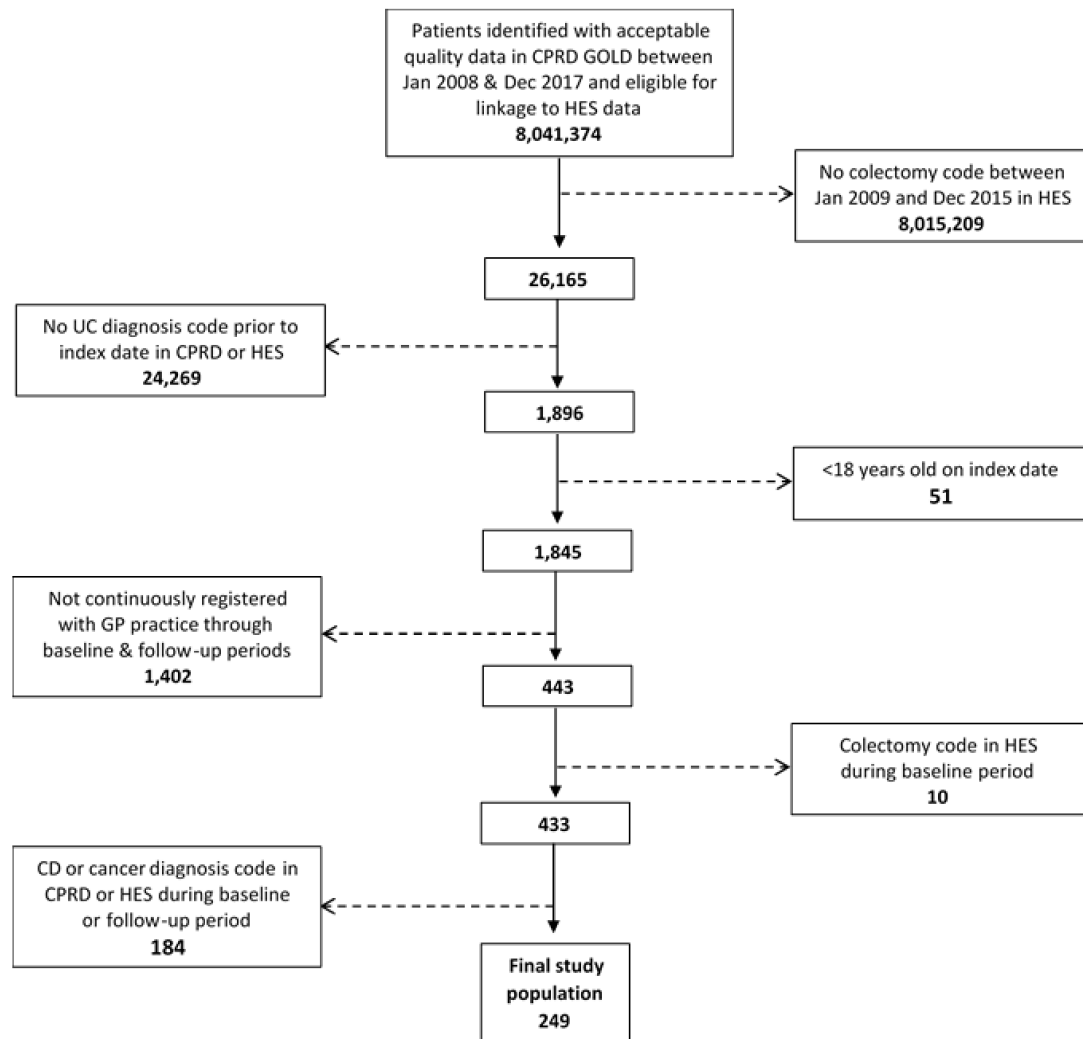

CD, Crohn's disease; CPRD, Clinical Practice Research Datalink; GP, General Practitioner; HES, Hospital Episode Statistics;

UC, ulcerative colitis
